# Supplementary material
Source: Research Square preprint supplement (doi:10.21203/rs.3.rs-9439017/v1)
Supplement: Supplementary file 1 [file 771720e11eaac5ed14163e8a.pdf]

West blot

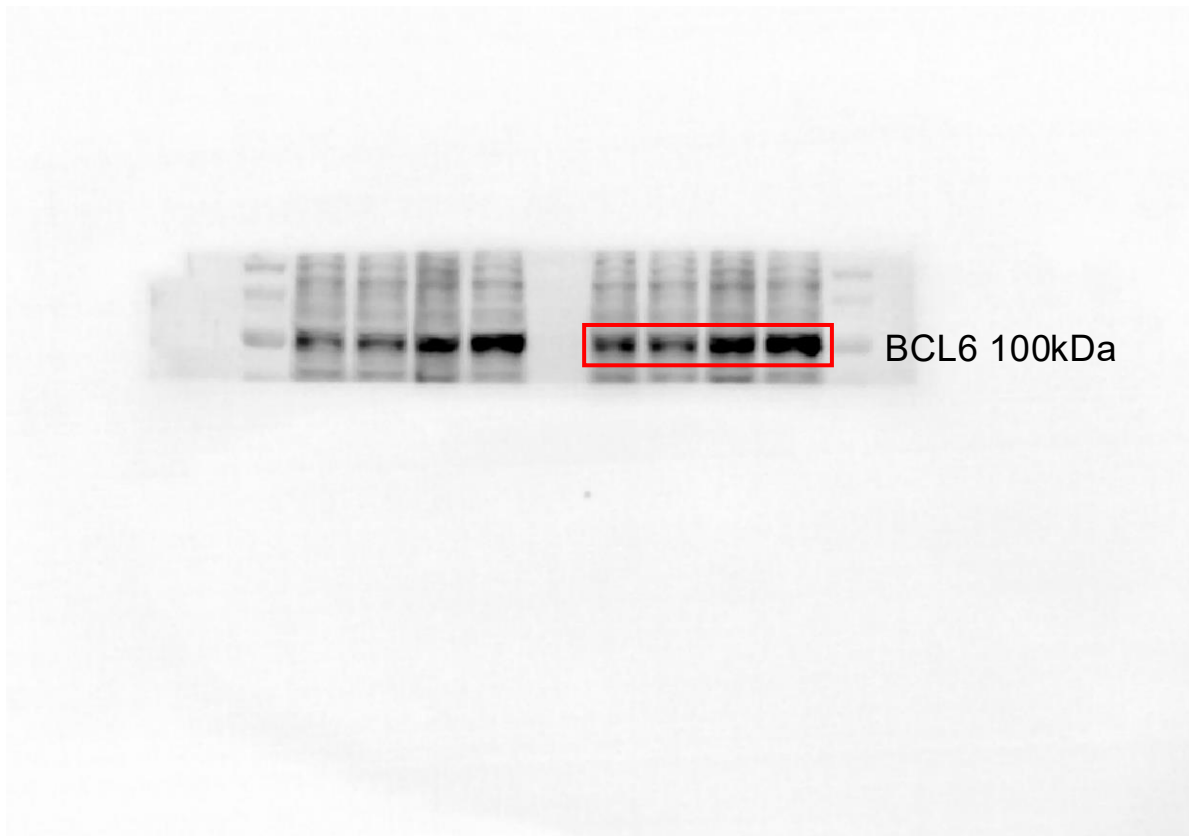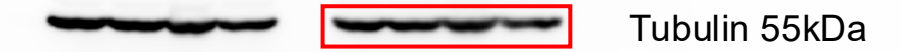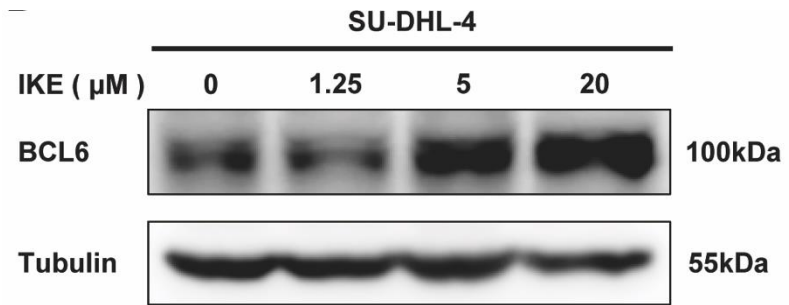

Figure 2D

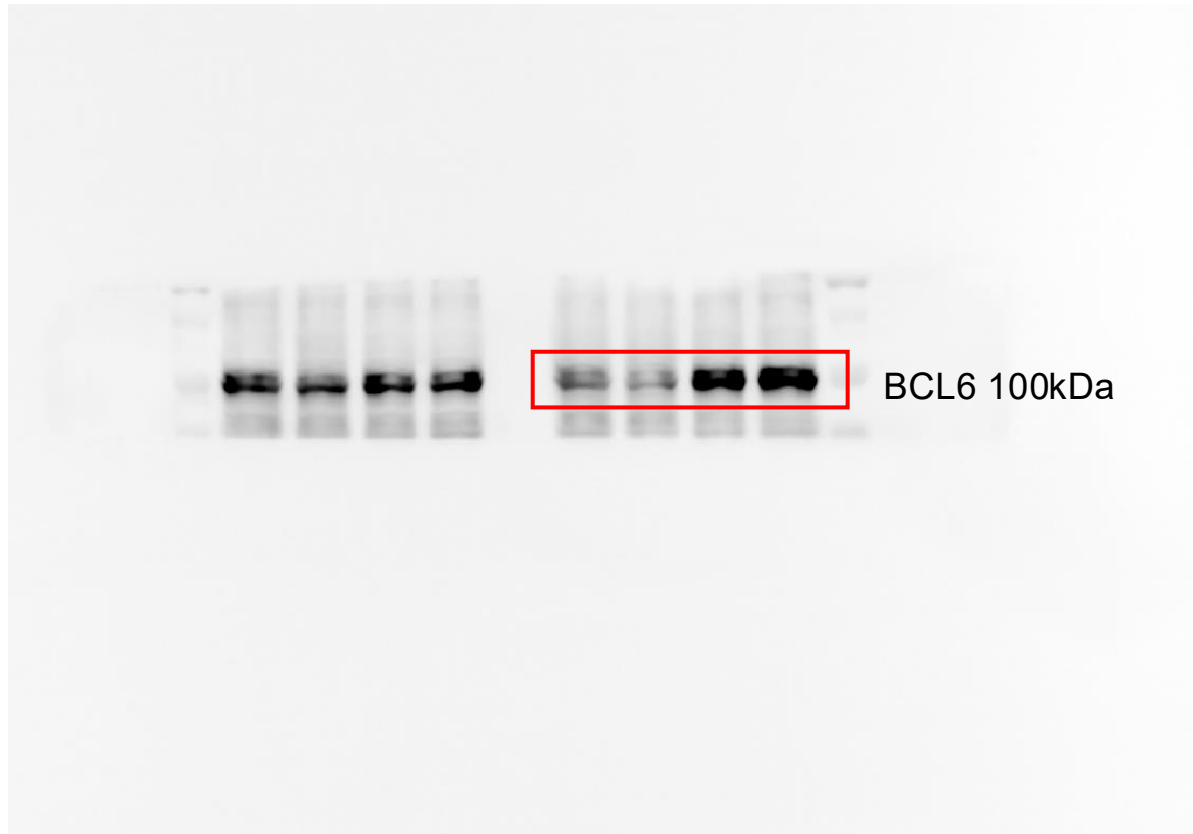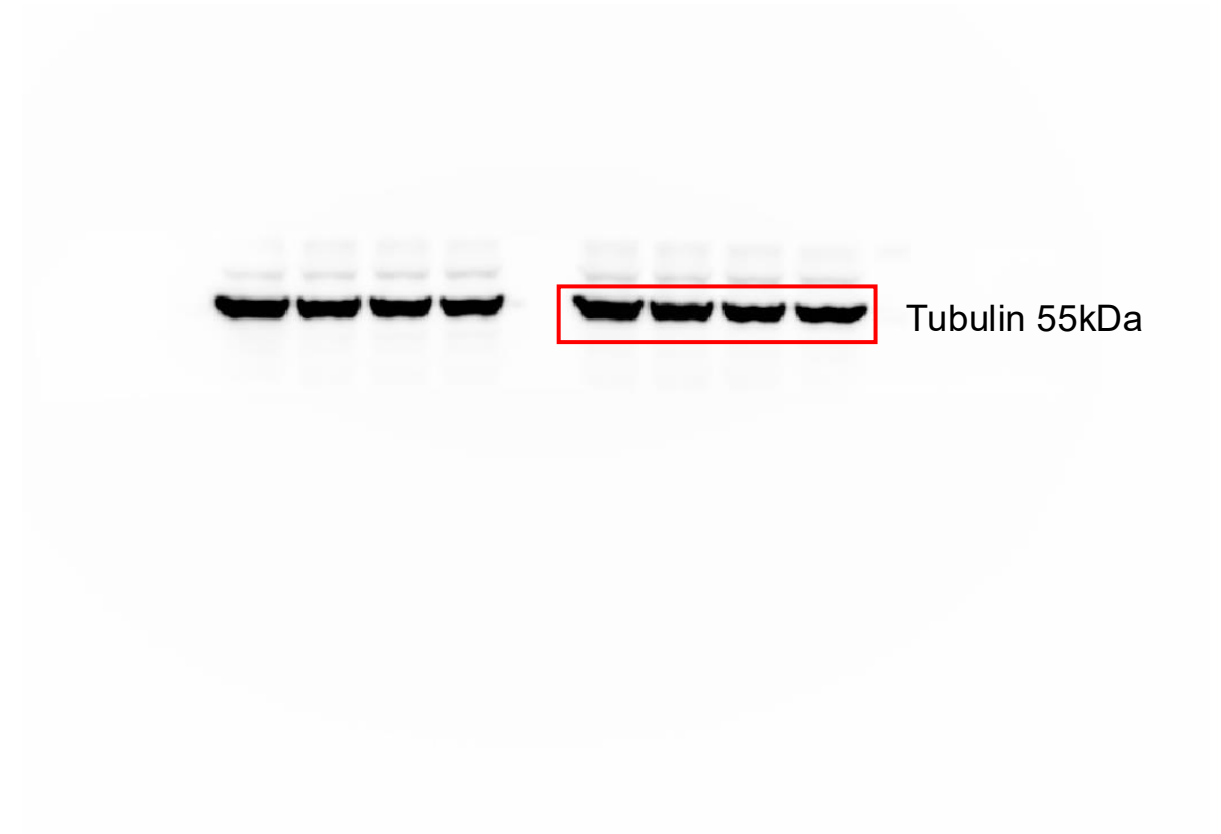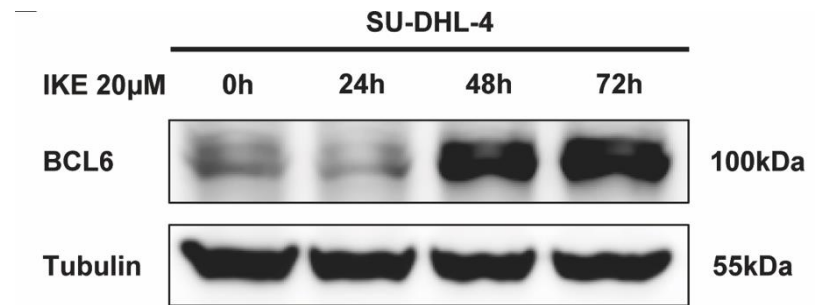

Figure 2E

BCL6 100kDa

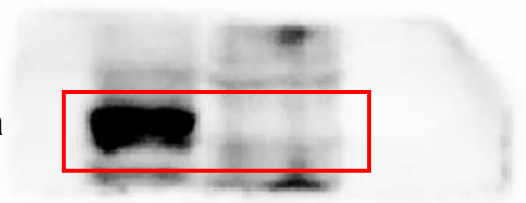

Tubulin 55kDa

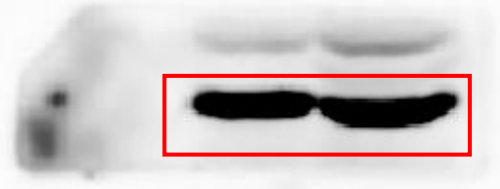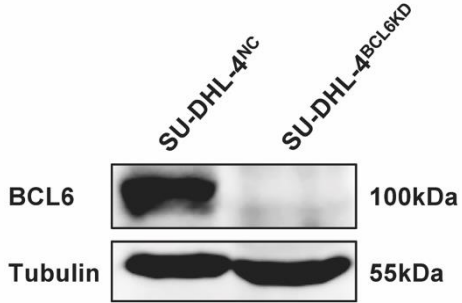

Figure 3E

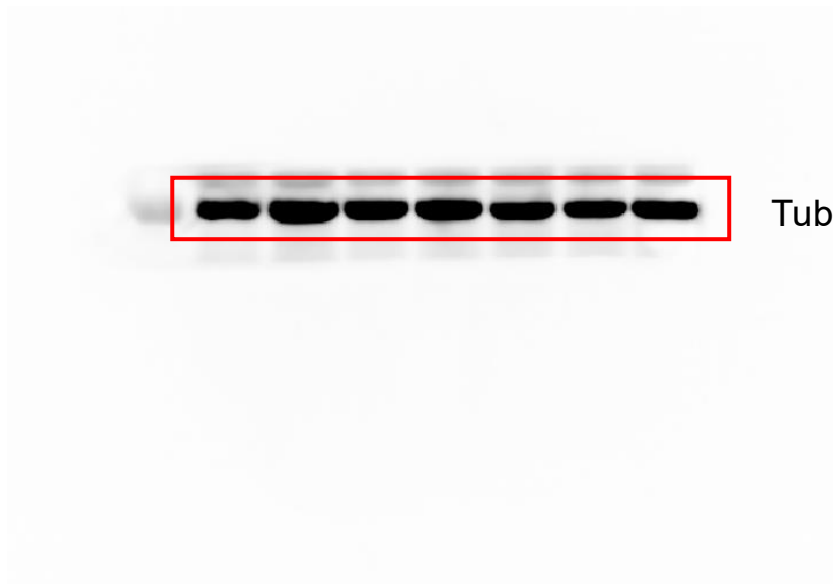

Tubulin 55kDa

BCL6 100kDa

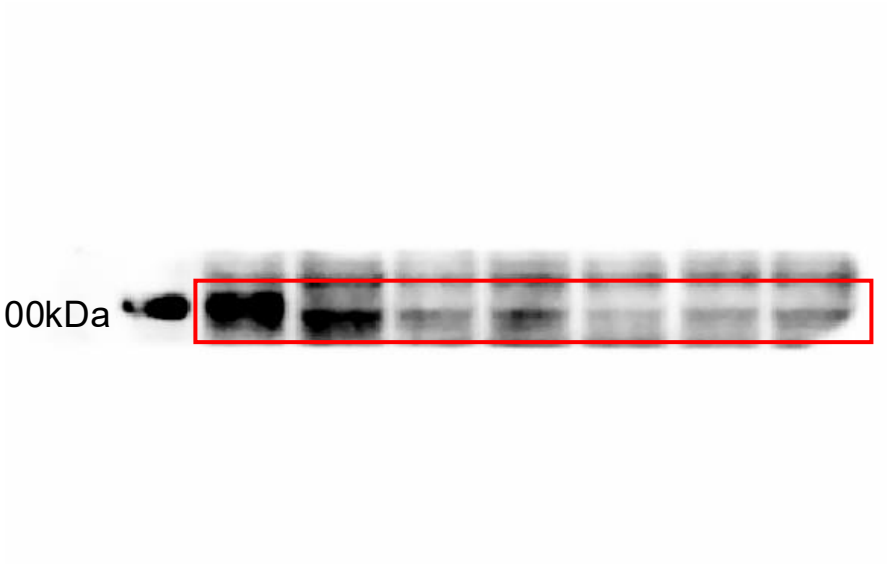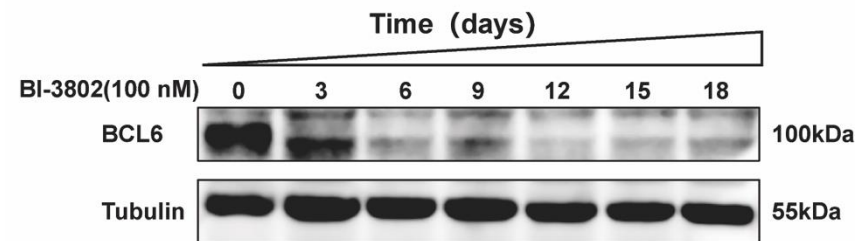

Figure 5D

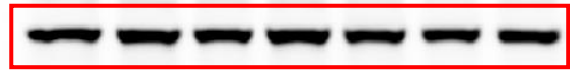

Tubulin 55kDa

SDHA 72kDa

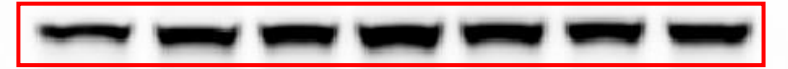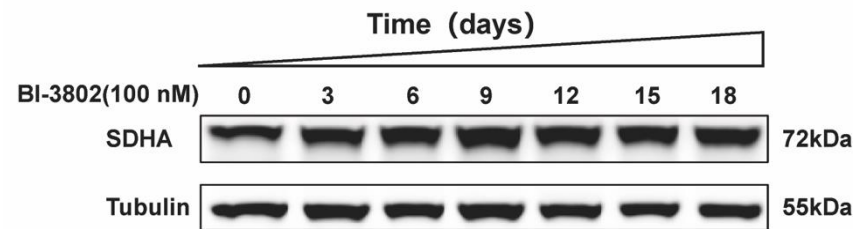

Figure 5D

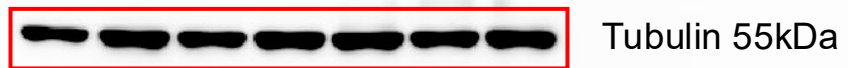

ALOX5 78kDa

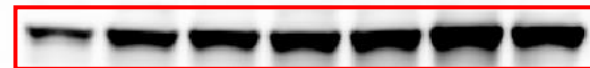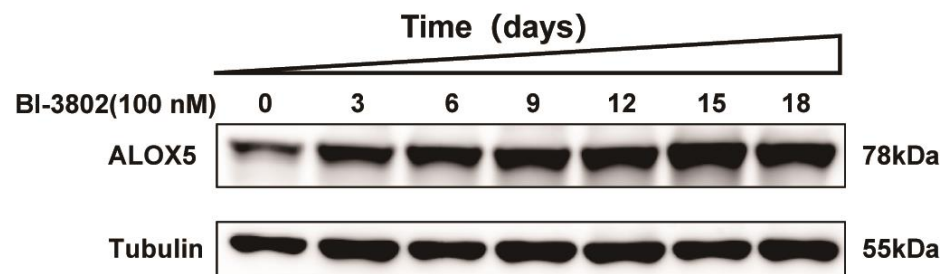

Figure 6B

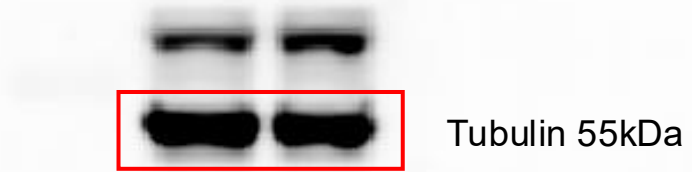

ALOX5 78kDa

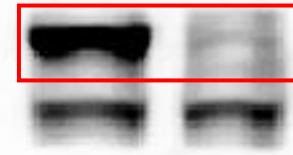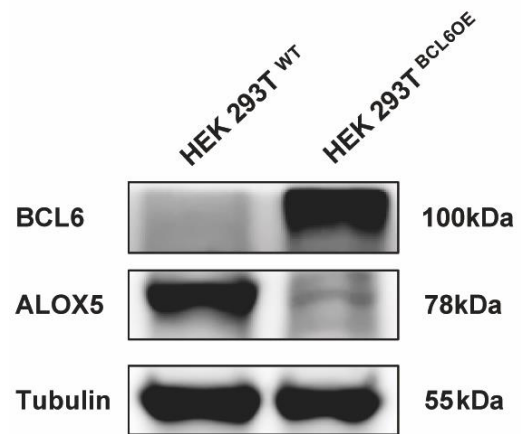

BCL6 100kDa

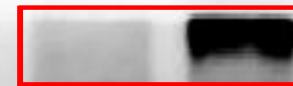

Figure 6D

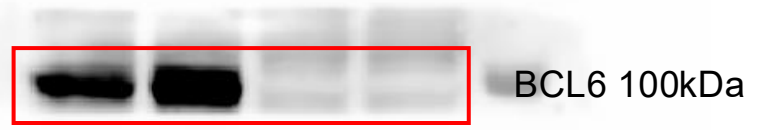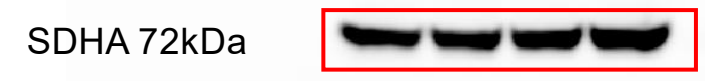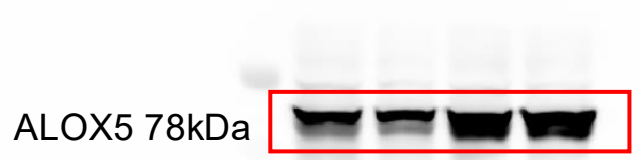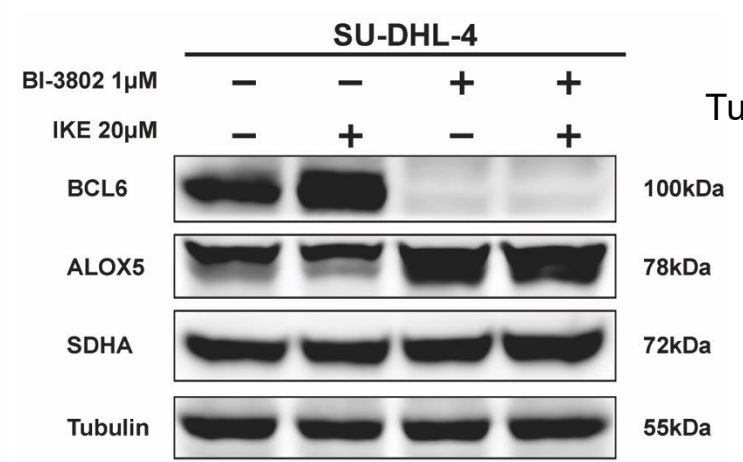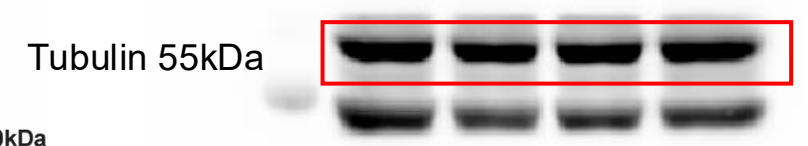

Figure 8A

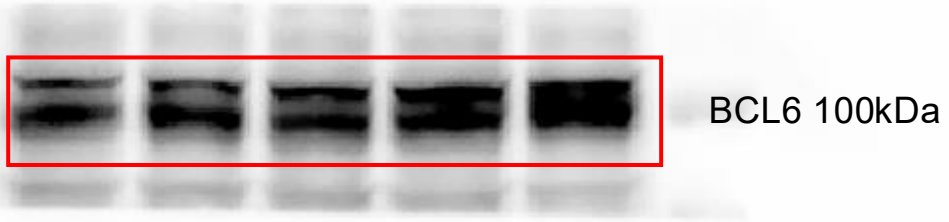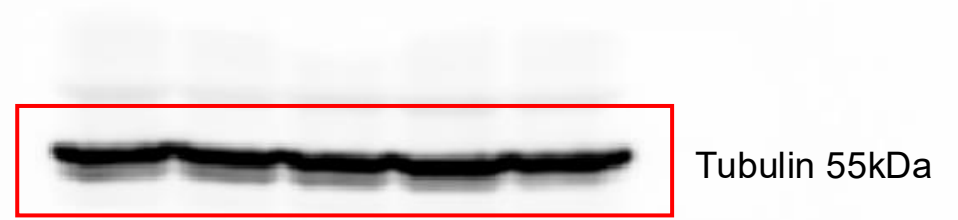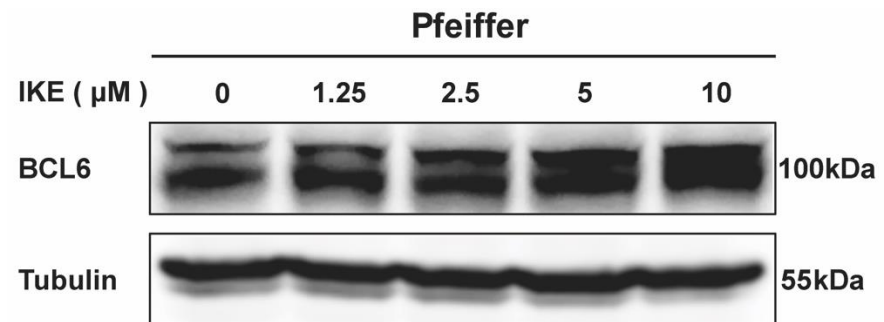

Figure S1C

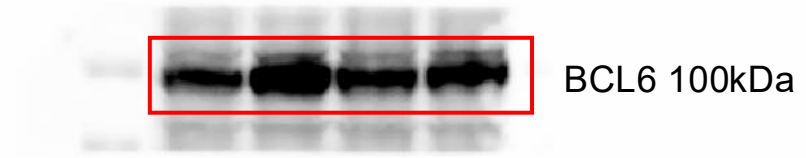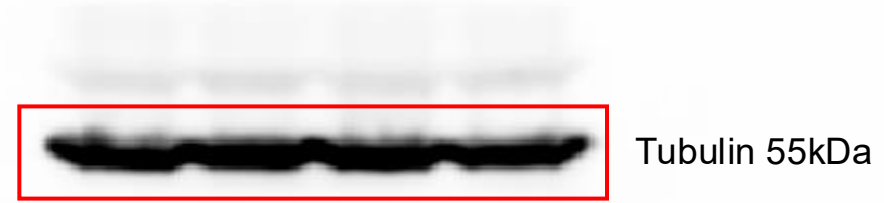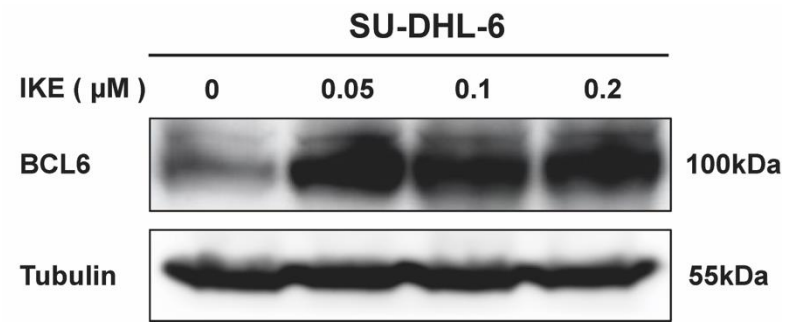

Figure S1D
