# Supplementary material
Source: Research Square preprint supplement (doi:10.21203/rs.3.rs-9439017/v1)
Supplement: Supplementary file 2 [file 80a965688cceab08aa3e52bb.docx]

Supplementary Table S1

Table 1. Detailed information of the primer sequences for qRT-PCR

| Table S1 Primers used for the qPCR |  | |
| --- | --- | --- |
| Gene name | | Primers |
| BCL6-F(human) | | GCCGGCTCAATAACATCGTT |
| BCL6-R(human) | | CTCATTGCAGAAGAAGGCCC |
| ALOX5-F(human) | | TGGAATGACTTCGCCGACTTTGAG |
| ALOX5-R(human) | | TAGCCAAACATCAGGTCTTCCTGC |
| Tubulin-F(human) | | TGAGATCCGAAATGGCCCATA |
| Tubulin-R(human) | | TAGTGACCACGGGCATAGTTG |
